# Supplementary material for: Pluronic F127-assisted partial decomposition of ammonium phosphomolybdate and its application as an efficient and recyclable catalyst for the alkylation of toluene with benzyl alcohol
Source: Royal Society of Chemistry journal article supplement (doi:10.1039/d2nj00679k), 2022-01-01
Supplement: d2nj00679k1.pdf [file d2nj00679k1.pdf]

**Pluronic F127-assisted partial decomposition of ammonium phosphomolybdate  
and the application as efficient and recyclable catalyst for the alkylation of  
toluene with benzyl alcohol**

Huabin Lian, Qiangmin Gu, Shumei Shi, Tingting Wang, Heng Zhang\*

School of Chemistry and Chemical Engineering, Qufu Normal University, Shandong 273165,  
China

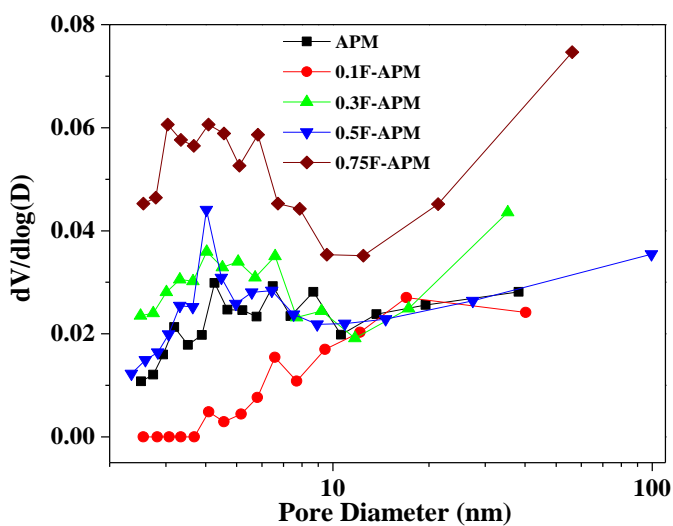

Fig. S1. Pore size distributions of the calcined samples.

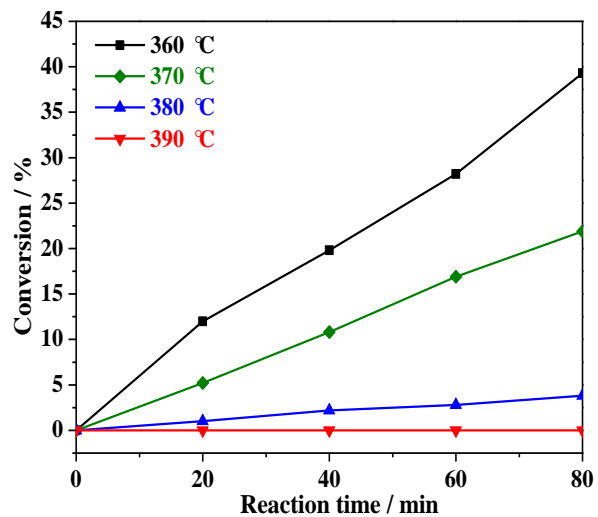

**Fig. S2.** Effect of calcination temperature on the catalytic performance of 0.5F-APM.

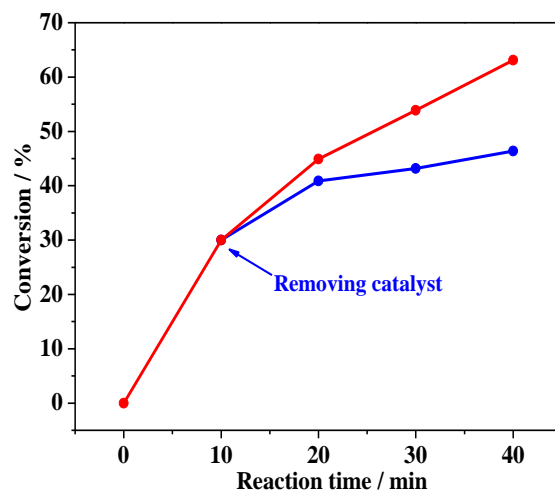

**Fig. S3.** Leaching test of H<sub>2</sub>APM for the alkylation of toluene with benzyl alcohol.

Reaction conditions: 25 mg catalyst, 10 mL toluene, 2.4 mmol benzyl alcohol, 90 °C.
